# Supplementary material for: Nutritional status of the elderly population in the Mahalaxmi municipality of Lalitpur district
Source: Research Square preprint supplement (doi:10.21203/rs.3.rs-7357341/v1), 2025-10-18
Supplement: Supplementary file 1 [file ec464ab03478b5a5b4a7986b.docx]

# **Appendix D: Research Instruments**

**Tool for Data Collection**

**Patan Academy of Health Science**

**School of Nursing and Midwifery**

**Lalitpur Nursing Campus**

**Sanepa, Lalitpur**

**Interview Schedule**

**Research title:** Nutritional Status among Elderly population in Mahalaxmi Municipality of Lalitpur District

You are invited to take part in this research. Before you decided it is important for you to understand why the research being done and what participants involved. Please take time to read the following information carefully. You can ask if there is anything that is not clear or if you would like more information. Take time to decide whether or not to you wish to take part. Thank you for reading this.

**Objectives of the study**: To assess the nutritional status of elderly population in Mahalaxmi municipality of Lalitpur District

**Inclusion criteria**: The elderly population age 70 years and above residing in Mahalaxmi municipality and available during the time of data collection.

Based the criteria you have been chosen as participant to take part in study and total 211 participants recruited to the study.

It is up to you to decide whether or not to take part. If you decide to take part you given this information sheet to keep and be asked to sign a consent form. You can withdraw at any time without giving a reason and without it affecting any benefits that you are entitled to.

It take about 30-45 minutes to answer the question.

There are no any possible disadvantages or risk of taking part in study. While there are no any immediate benefits for those people participating in the study.

All the information that we collect about your during the course of the research kept strictly confidential. The data collected during the course of the project might be used for additional or subsequent research.

**Thank you for participation.**

**Part-A: Question Related to Socio Demographic Information**

**Instruction:** Researcher asked following questions to the respondents and marked (✓) or write the responses given by the respondents~~.~~

|  | **Questions** |
| --- | --- |
| 1 | **Age of the participants ………. (in completed years)** |
| 2 | **Gender**   1. Male 2. Female |
| 3 | **Marital Status75**   1. Never married 2. Married/living together 3. Divorced/ Separated 4. Widowed |
| 4 | **The total number of family members** (living together in the household sharing the same kitchen) ……….. |
| 5 | **Type of Family**   1. Nuclear 2. Joint 3. extended |
| 6 | **Educational Level70**   1. No education 2. Primary (1-5) 3. Some secondary (6-10) 4. More than secondary above |
| 7 | **Living arrangement**   1. Living alone 2. Living with spouse only 3. Living with son and daughter in law 4. Living with son, daughter in law and spouse 5. Living with other (specify)……… |
| 8 | **Source of income**   1. Agriculture 2. Business 3. Pension 4. Old age allowance 5. Others |
| 9 | **Have you ever consumed any alcohol?73**   1. Never used (life time abstainers) 2. former used (haven’t consumed alcohol in past 12 month) 3. currrently used (consumed alcohol in past 30 days) |
| 10 | **Have you ever consumed any Tobacco related products?73**   1. Never used tobacco product 2. former used tobacco product 3. currrently used tobacco product |

**Part-B: Question Related to Dietary Pattern among elderly population**

**Instruction: -** There are 21 questions related to dietary pattern among elderly population in the Mahalaxmi municipality of Lalitpur district. First, I asked questions related to dietary pattern to elderly population. I read out the questions for you and indicate your answer:

| SN | **Questions** |
| --- | --- |
| **11** | **How many major meal do you take food in a day………?** |
| **12** | **Do you go for shopping to buy preferred food? (if Yes, go to Q13)**   1. Yes 2. No |
| **13** | **Who arrange food to you and your family?**   1. Children 2. Spouse 3. In laws 4. Others |
| **14** | **Do you cook your own meal? ?(if Yes go to Q15)**   1. Yes 2. No |
| **15** | **How often did you cook your own meal?..........** |
| **16** | **How much fluid (water) is consumed per day?...........ml** (1glass=200ml) |
| **17** | **Do you consumed tea/coffee?(If yes go to Q18)**   1. Yes 2. No |
| **18** | **How many times did you consumed tea, coffee per day?**   1. One time per day 2. Two times per day 3. Three times per day 4. More than three times per day |
| **19** | **What is your dietary**  **Preference ?**   1. Vegetarian 2. Mixed vegetarian |
| **20** | **How often do you eat meat and meat products?**   1. Regularly (Daily) 2. Sometimes (1-3 days a week) 3. Once in a week 4. Once in a month |
| **21** | **How often do you eat pulses?**   1. Regularly (Daily) 2. Sometimes (1-3 days a week) 3. Once in a week 4. Once in a month |
| **22** | **How often do you eat fruits?**   1. Regularly (Daily) 2. Sometimes (1-3 days a week) 3. Once in a week 4. Once in a month |
| **23** | **How often do you eat Vegetables?**   1. Regularly (Daily) 2. Sometimes (1-3 days a week) 3. Once in a week 4. Once in a month |
| **24** | **How often do you eat milk and milk product?**   1. Regularly (Daily) 2. Sometimes (1-3 days a week) 3. Once in 14 days 4. Once in a month 5. Not consumed milk |
| **25** | **Do you have any food restriction? (if Yes go to Q26)**   1. Yes 2. No |
| **26** | **What did you restrict in your diet?**   1. Sugar 2. Salt 3. Beans 4. Onion 5. Garlic 6. Others |
| 27 | **Did you take any fasting? (if Yes go to Q28**)   1. Yes 2. No |
| **28** | **How often did you take fasting?**   1. Once in a week 2. Once in 15 days 3. Once in a month 4. Other(specify) |
| **29** | **Did you skip any meal? (if yes, go to Q30)**   1. Yes 2. No |
| **30** | **How many meal (in total)did you skip in a week except fasting? …………** |
| **30a** | **Which meal did you skip?**   1. Breakfast 2. Lunch 3. snacks 4. Dinner |
| **30b** | **What is the reason to skip the meal?**   1. Elimination problem 2. Indigestion 3. Forget to eat 4. No one to prepare food 5. Others(specify) |
| **31** | **Have you take dietary supplement?(if yes go to Q32)**   1. Yes 2. No |
| **32** | **If yes, what dietary supplement do you take?[multiple response]**   1. Multivitamin 2. Calcium 3. Vitamin B12 4. Others(specify) |

**Part-C: Question Related to health Problems among elderly population**

**Instruction: -** There were 7 questions related to health related problem among elderly population in the Mahalaxmi municipality of Lalitpur district. First, I asked questions related to health problem to elderly population. I read out the questions for you and indicate your answer:

| SN | Question |
| --- | --- |
| 33 | **Do you have chronic health problems?(if yes go to Q34)**   1. Yes 2. No |
| 34 | **What chronic health problems are you currently suffering from? (Multiple response)**   | **SN** | **Health problems** | **Yes** | **No** | | --- | --- | --- | --- | | a) | Hypertension |  |  | | b) | Diabetes |  |  | | c) | cancer |  |  | | d) | Mental problem |  |  | | e) | COPD |  |  | | f) | Others (Specify) |  |  | |
| 35 | **Have you experience Dry mouth? (past one month)**   1. Yes 2. No |
| 36 | **Have you experience any feeding problem past one month?(if Yes go to Q37)**   1. Yes 2. No |
| 37 | **Which feeding problem do you experience?(multiple response)**   | **SN** | **Feeding problem** | **Yes** | **No** | | --- | --- | --- | --- | | a) | Biting problem |  |  | | b) | Chewing problem |  |  | | c) | Swallowing problem |  |  | | d) | Others (Specify) |  |  | |
| 38 | **Have you experience any Gastro-intestinal problem? (past one month)**   1. Yes 2. No |
| 39 | **Which Gastro-intestinal problem are you currently suffering from in past one month? (Multiple response)**   | **SN** | **Gastro-intestinal problem** | **Yes** | **No** | | --- | --- | --- | --- | | a) | Diarrhoea |  |  | | b) | Constipation |  |  | | c) | Loss of appetite |  |  | | d) | Change in taste of food |  |  | | e) | Others (Specify) |  |  | |

**Part-D: Anthropometric Measurement among elderly population**

**Instruction: -** The height and weight of the elderly population was taken and body mass index was calculated. The BMI of elderly was categorized as

- - Underweight: BMI < 17.5
  - Normal weight: BMI 17.5-22.9
  - Overweight: BMI 23.0-27.9
  - Obese: 28 and above

| **SN** | **Measurement** |
| --- | --- |
| **40** | **Height in meter** |
| **41** | **Weight in kilogram** |
| **42** | **Body mass index** |

**“Thank you so much for your valuable time”**
